# Supplementary material for: Cohort profile: early school years follow-up of the Asking Questions about Alcohol in Pregnancy Longitudinal Study in Melbourne, Australia (AQUA at 6)
Source: HighWire-hosted journal article supplement (doi:10.1136/bmjopen-2021-054706), 2022-01-01
Supplement: bmjopen-2021-054706supp001_data_supplement.pdf [file bmjopen-2021-054706supp001_data_supplement.pdf]

**Supplementary Table** Telepsychology modifications to the in-person assessment protocol

| <b>Outcome domain</b> | <b>Assessments (in-person)</b>                                                                                                                                                                                                                                                                         | <b>Assessment modification (telepsychology)</b>                                                                                                                                                                                                                          |
|-----------------------|--------------------------------------------------------------------------------------------------------------------------------------------------------------------------------------------------------------------------------------------------------------------------------------------------------|--------------------------------------------------------------------------------------------------------------------------------------------------------------------------------------------------------------------------------------------------------------------------|
| General intelligence  | Core subtests of the Wechsler Intelligence Scale for Children (WISC-V).                                                                                                                                                                                                                                | Block Design, Coding and Symbol Search are not administered online. All other primary subtests are administered verbally or via screen-mirroring.                                                                                                                        |
| Language              | Verbal Comprehension Index of the WISC-V.                                                                                                                                                                                                                                                              | No modification, tests administered verbally.                                                                                                                                                                                                                            |
| Academic functioning  | Subtests from the Wechsler Individual Achievement Test (WIAT-III). Literacy is assessed using the word reading and spelling subtests, while mathematics is assessed using the numerical operations subtest                                                                                             | Numerical Operations are administered online as hard-copy response booklet cannot be adapted digitally.<br>Word Reading stimulus is screen-shared, and child gives verbal responses.<br>No modifications to Spelling, child writes response on paper and shows examiner. |
| Attention             | Test of Everyday Attention for Children-Version 2 (TEA-Ch2) subtests ( <i>age &lt;8 years</i> : Balloon Hunt, Barking, Sustained Attention to Response Task and Simple Reaction Time; <i>age ≥8 years</i> : Hector Cancellation, Vigil, Sustained Attention to Response Task and Simple Reaction Time) | Balloon Hunt, Hector Cancellation, Simple Reaction Time and Sustained Attention to Response Task will not be administered online as they cannot be adapted for remote administration. <sup>1</sup>                                                                       |
| Working memory        | Digits Recall (WISC-V), Blocks Recall and Backward Block Recall subtests of the Working Memory Test Battery for Children (WMTB-C)                                                                                                                                                                      | Block recall requires a block board and is not administered online.                                                                                                                                                                                                      |
| Cognitive flexibility | Contingency Naming Test (CNT 1-3).                                                                                                                                                                                                                                                                     | CNT stimulus sheet is screen-shared, and child gives verbal responses.                                                                                                                                                                                                   |
| Episodic memory       | The California Verbal Learning Test – Children’s version (CVLT-C)                                                                                                                                                                                                                                      | No modification, tests administered verbally.                                                                                                                                                                                                                            |
| Motor functioning     | The Movement Assessment Battery for Children (MABC2).                                                                                                                                                                                                                                                  | The MABC2 is not administered online.                                                                                                                                                                                                                                    |
