# Supplementary material for: Cohort profile: early school years follow-up of the Asking Questions about Alcohol in Pregnancy Longitudinal Study in Melbourne, Australia (AQUA at 6)
Source: HighWire-hosted journal article supplement (doi:10.1136/bmjopen-2021-054706), 2022-01-01
Supplement: bmjopen-2021-054706supp002_data_supplement.pdf [file bmjopen-2021-054706supp002_data_supplement.pdf]

## Asking Questions about Alcohol in pregnancy study (AQUA): Prenatal alcohol consumption assessment

### ALCOHOL CONSUMPTION QUESTIONS

Using the code(s) provided in the Drinks Guide ([for drinks guide see page 3](#)), please complete the table below, including:

- what type of drink(s) you usually drank in this period ([for time points see page 2](#)),
- how often you usually drank this type of alcohol (for each), and
- how many of these would you usually drink on each occasion (for each type of drink).

|    | Code for drink type | Frequency                                                                                                                                                                                                                                               | Number per occasion                                                                                                                                                                                                   |
|----|---------------------|---------------------------------------------------------------------------------------------------------------------------------------------------------------------------------------------------------------------------------------------------------|-----------------------------------------------------------------------------------------------------------------------------------------------------------------------------------------------------------------------|
| 1. |                     | <input type="checkbox"/> less than once a month<br><input type="checkbox"/> 1 to 2 days per month<br><input type="checkbox"/> 1 to 2 days per week<br><input type="checkbox"/> 3 to 4 days per week<br><input type="checkbox"/> 5 or more days per week | <input type="checkbox"/> less than 1 drink<br><input type="checkbox"/> 1 to 2 drinks<br><input type="checkbox"/> 3 to 4 drinks<br><input type="checkbox"/> 5 to 6 drinks<br><input type="checkbox"/> 7 or more drinks |
| 2. |                     | <input type="checkbox"/> less than once a month<br><input type="checkbox"/> 1 to 2 days per month<br><input type="checkbox"/> 1 to 2 days per week<br><input type="checkbox"/> 3 to 4 days per week<br><input type="checkbox"/> 5 or more days per week | <input type="checkbox"/> less than 1 drink<br><input type="checkbox"/> 1 to 2 drinks<br><input type="checkbox"/> 3 to 4 drinks<br><input type="checkbox"/> 5 to 6 drinks<br><input type="checkbox"/> 7 or more drinks |
| 3. |                     | <input type="checkbox"/> less than once a month<br><input type="checkbox"/> 1 to 2 days per month<br><input type="checkbox"/> 1 to 2 days per week<br><input type="checkbox"/> 3 to 4 days per week<br><input type="checkbox"/> 5 or more days per week | <input type="checkbox"/> less than 1 drink<br><input type="checkbox"/> 1 to 2 drinks<br><input type="checkbox"/> 3 to 4 drinks<br><input type="checkbox"/> 5 to 6 drinks<br><input type="checkbox"/> 7 or more drinks |
| 4. |                     | <input type="checkbox"/> less than once a month<br><input type="checkbox"/> 1 to 2 days per month<br><input type="checkbox"/> 1 to 2 days per week<br><input type="checkbox"/> 3 to 4 days per week<br><input type="checkbox"/> 5 or more days per week | <input type="checkbox"/> less than 1 drink<br><input type="checkbox"/> 1 to 2 drinks<br><input type="checkbox"/> 3 to 4 drinks<br><input type="checkbox"/> 5 to 6 drinks<br><input type="checkbox"/> 7 or more drinks |
| 5. |                     | <input type="checkbox"/> less than once a month<br><input type="checkbox"/> 1 to 2 days per month<br><input type="checkbox"/> 1 to 2 days per week<br><input type="checkbox"/> 3 to 4 days per week<br><input type="checkbox"/> 5 or more days per week | <input type="checkbox"/> less than 1 drink<br><input type="checkbox"/> 1 to 2 drinks<br><input type="checkbox"/> 3 to 4 drinks<br><input type="checkbox"/> 5 to 6 drinks<br><input type="checkbox"/> 7 or more drinks |

Did you ever drink more than you would normally have done (as you described above), for example on special occasions or during difficult times?

- no  
 yes

Approximately, how many times did this occur during this period? (please provide number of occasions)

occasions

Using the code(s) provided in the Drinks Guide, please complete the table below to show;

a) what type of drink(s) you usually drank on these special occasions or during difficult times, and

b) how many of these would you usually drink on each occasion (for each type of drink)

|    | Code for drink type | Number per occasion                                                                                                                                                                                                   |
|----|---------------------|-----------------------------------------------------------------------------------------------------------------------------------------------------------------------------------------------------------------------|
| 1. |                     | <input type="checkbox"/> less than 1 drink<br><input type="checkbox"/> 1 to 2 drinks<br><input type="checkbox"/> 3 to 4 drinks<br><input type="checkbox"/> 5 to 6 drinks<br><input type="checkbox"/> 7 or more drinks |
| 2. |                     | <input type="checkbox"/> less than 1 drink<br><input type="checkbox"/> 1 to 2 drinks<br><input type="checkbox"/> 3 to 4 drinks<br><input type="checkbox"/> 5 to 6 drinks<br><input type="checkbox"/> 7 or more drinks |
| 3. |                     | <input type="checkbox"/> less than 1 drink<br><input type="checkbox"/> 1 to 2 drinks<br><input type="checkbox"/> 3 to 4 drinks<br><input type="checkbox"/> 5 to 6 drinks<br><input type="checkbox"/> 7 or more drinks |
| 4. |                     | <input type="checkbox"/> less than 1 drink<br><input type="checkbox"/> 1 to 2 drinks<br><input type="checkbox"/> 3 to 4 drinks<br><input type="checkbox"/> 5 to 6 drinks<br><input type="checkbox"/> 7 or more drinks |
| 5. |                     | <input type="checkbox"/> less than 1 drink<br><input type="checkbox"/> 1 to 2 drinks<br><input type="checkbox"/> 3 to 4 drinks<br><input type="checkbox"/> 5 to 6 drinks<br><input type="checkbox"/> 7 or more drinks |

If '7 or more', what was the maximum number? (please provide maximum number of drinks on one occasion)

drinks

### TIME POINTS ADMINISTERED, INCLUDING PERICONCEPTION

These questions were administered at each trimester to collectively cover 5 time periods:

- 1) In the 3 months before you became pregnant
- 2) Since you became pregnant, but before you knew you were pregnant
- 3) Since you found out you were pregnant, to the end of your 13<sup>th</sup> week of pregnancy
- 4) Since your 14<sup>th</sup> week of pregnancy to the end of your 26<sup>th</sup> week of pregnancy
- 5) Since your 26<sup>th</sup> week of pregnancy (administered at around 35 weeks gestation)

## DRINKS GUIDE

© ERC, Royal Children’s Hospital Melbourne, Australia, 2010

**Wine including fortified wines**

|                   |                   |                      |                     |                     |                    |
|-------------------|-------------------|----------------------|---------------------|---------------------|--------------------|
| Red wine<br>150ml | Red wine<br>100ml | Port, sherry<br>60ml | White wine<br>150ml | White wine<br>100ml | Champagne<br>150ml |
|                   |                   |                      |                     |                     |                    |
| W1                | W2                | W3                   | W4                  | W5                  | W6                 |

**Beer including cider**

|               |              |              |       |                |              |              |       |
|---------------|--------------|--------------|-------|----------------|--------------|--------------|-------|
| Pot 285ml     |              |              |       | Schooner 425ml |              |              |       |
| Full strength | Mid strength | Low strength | Cider | Full strength  | Mid strength | Low strength | Cider |
|               |              |              |       |                |              |              |       |
| B1            | B2           | B3           | C1    | B4             | B5           | B6           | C2    |
| Pint 568ml    |              |              |       |                |              |              |       |
| Full strength | Mid strength | Low strength | Cider |                |              |              |       |
|               |              |              |       |                |              |              |       |
| B7            | B8           | B9           | C3    |                |              |              |       |
| Bottle 375ml  |              |              |       | Can 375ml      |              |              |       |
| Full strength | Mid strength | Low strength | Cider | Full strength  | Mid strength | Low strength |       |
|               |              |              |       |                |              |              |       |
| B10           | B11          | B12          | C4    | B13            | B14          | B15          |       |

**Spirits including mixed drinks**

|                   |                         |                         |                         |                          |                          |                          |          |
|-------------------|-------------------------|-------------------------|-------------------------|--------------------------|--------------------------|--------------------------|----------|
| Nip, shot<br>30ml | Alcoholic<br>soda 275ml | Alcoholic<br>soda 330ml | Alcoholic<br>soda 660ml | Pre-mix<br>spirits 250ml | Pre-mix<br>spirits 300ml | Pre-mix<br>spirits 375ml | Cocktail |
|                   |                         |                         |                         |                          |                          |                          |          |
| S1                | S2                      | S3                      | S4                      | S5                       | S6                       | S7                       | S8       |

© ERC, The Royal Children’s Hospital, Melbourne 2010

## ALCOHOL CONTENT KEY TO AQUA STUDY DRINKS GUIDE

| Drink type                    | Code | Volume ml | ABV <sup>a</sup> % | Std drinks <sup>b</sup> n | Total gAA <sup>c</sup> |
|-------------------------------|------|-----------|--------------------|---------------------------|------------------------|
| Red wine, large glass         | W1   | 150       | 13.5               | 1.5                       | 15                     |
| Red wine, small glass         | W2   | 100       | 13.5               | 1.0                       | 10                     |
| Port, sherry, small glass     | W3   | 60        | 17.5               | 0.9                       | 9                      |
| White wine, large glass       | W4   | 150       | 11.5               | 1.5                       | 15                     |
| White wine, small glass       | W5   | 100       | 11.5               | 1.0                       | 10                     |
| Champagne, large glass        | W6   | 150       | 12.0               | 1.5                       | 15                     |
| Beer, full strength, pot      | B1   | 285       | 4.8                | 1.1                       | 11                     |
| Beer, mid strength, pot       | B2   | 285       | 3.5                | 0.8                       | 8                      |
| Beer, low strength, pot       | B3   | 285       | 2.7                | 0.6                       | 6                      |
| Cider, pot                    | C1   | 285       | 4.8                | 1.1                       | 11                     |
| Beer, full strength, schooner | B4   | 425       | 4.8                | 1.6                       | 16                     |
| Beer, mid strength, schooner  | B5   | 425       | 3.5                | 1.2                       | 12                     |
| Beer, low strength, schooner  | B6   | 425       | 2.7                | 0.9                       | 9                      |
| Cider, schooner               | C2   | 425       | 4.8                | 1.6                       | 16                     |
| Beer, full strength, pint     | B7   | 568       | 4.8                | 2.1                       | 21                     |
| Beer, mid strength, pint      | B8   | 568       | 3.5                | 1.6                       | 16                     |
| Beer, low strength, pint      | B9   | 568       | 2.7                | 1.2                       | 12                     |
| Cider, pint                   | C3   | 568       | 4.8                | 2.1                       | 21                     |
| Beer, full strength, bottle   | B10  | 375       | 4.8                | 1.4                       | 14                     |
| Beer, mid strength, bottle    | B11  | 375       | 3.5                | 1.0                       | 10                     |
| Beer, low strength, bottle    | B12  | 375       | 2.7                | 0.8                       | 8                      |
| Cider, bottle                 | C4   | 375       | 4.8                | 1.4                       | 14                     |
| Beer, full strength, can      | B13  | 375       | 4.8                | 1.4                       | 14                     |
| Beer, mid strength, can       | B14  | 375       | 3.5                | 1.0                       | 10                     |
| Beer, low strength, can       | B14  | 375       | 2.7                | 0.8                       | 8                      |
| Cider, can                    | C5   | 375       | 4.8                | 1.4                       | 14                     |
| Spirits, nip/shot             | S1   | 30        | 40                 | 1.0                       | 10                     |
| Alcoholic soda, small bottle  | S2   | 275       | 5.0                | 1.1                       | 11                     |
| Alcoholic soda, mid bottle    | S3   | 330       | 5.0                | 1.2                       | 12                     |
| Alcoholic soda, large bottle  | S4   | 660       | 5.0                | 2.6                       | 26                     |
| Pre-mix spirits, small can    | S5   | 250       | 5.0                | 0.9                       | 9                      |
| Pre-mix spirits, mid can      | S6   | 300       | 5.0                | 1.1                       | 11                     |
| Pre-mix spirits, large can    | S7   | 375       | 5.0                | 1.4                       | 14                     |
| Cocktail, glass               | S8   | n/a       | n/a                | 2.5                       | 25                     |

<sup>a</sup> ABV: Approximate alcohol content by volume, based on the standard drinks guide published by the Australian Government

<sup>b</sup> STD drinks: based on the standard drinks guide published by the Australian Government.

<sup>c</sup> gAA: total grams of absolute alcohol contained in one drink. One standard drink in Australia is equal to 10 gAA.

(<https://www.health.gov.au/health-topics/alcohol/about-alcohol/standard-drinks-guide>)
